# Supplementary material for: Racial and Ethnic Inequities in Cancer Care Continuity During the COVID-19 Pandemic Among Those With SARS-CoV-2
Source: PubMed Central journal article supplement (PMC11107297; doi:10.1001/jamanetworkopen.2024.12050), 2024-05-20
Supplement: jamanetwopen-e2412050-s001.pdf [file jamanetwopen-e2412050-s001.pdf]

## Data Sharing Statement

Islam. Racial and Ethnic Inequities in Cancer Care Continuity During the COVID-19 Pandemic Among Those With SARS-CoV-2. *JAMA Netw Open*. Published May 20, 2024.  
doi:10.1001/jamanetworkopen.2024.12050

### Data

**Data available:** No
